# Supplementary material for: A Genetically Encoded Fluorescent Biosensor for Intracellular Measurement of Malonyl-CoA
Source: PubMed Central journal article supplement (PMC11463626; doi:10.1101/2024.09.27.615526), 2024-09-28
Supplement: media-1.pdf [file media-1.pdf]

## Supplemental Information

### A Genetically Encoded Fluorescent Biosensor for Intracellular Measurement of Malonyl-CoA

Brodie L. Ranzau<sup>1, 5</sup>, Tiffany D. Robinson<sup>1, 5</sup>, Jack M. Scully<sup>1</sup>, Edmund D. Kapelczack<sup>2</sup>, Teagan S. Dean<sup>1</sup>, Tara TeSlaa<sup>2, 3</sup> and Danielle L. Schmitt<sup>1, 3, 4\*</sup>

<sup>1</sup>Department of Chemistry and Biochemistry, University of California, Los Angeles, Los Angeles, CA, USA

<sup>2</sup>Department of Molecular and Medical Pharmacology, David Geffen School of Medicine, University of California, Los Angeles, Los Angeles, CA, USA

<sup>3</sup>Molecular Biology Institute, University of California, Los Angeles, Los Angeles, CA, USA

<sup>4</sup>Institute for Quantitative and Computational Biosciences, University of California, Los Angeles, Los Angeles, CA, USA

<sup>5</sup>These authors contributed equally

\*Corresponding author email: [dlschmitt@chem.ucla.edu](mailto:dlschmitt@chem.ucla.edu)

## Ranzau et al Supplemental Figure 1

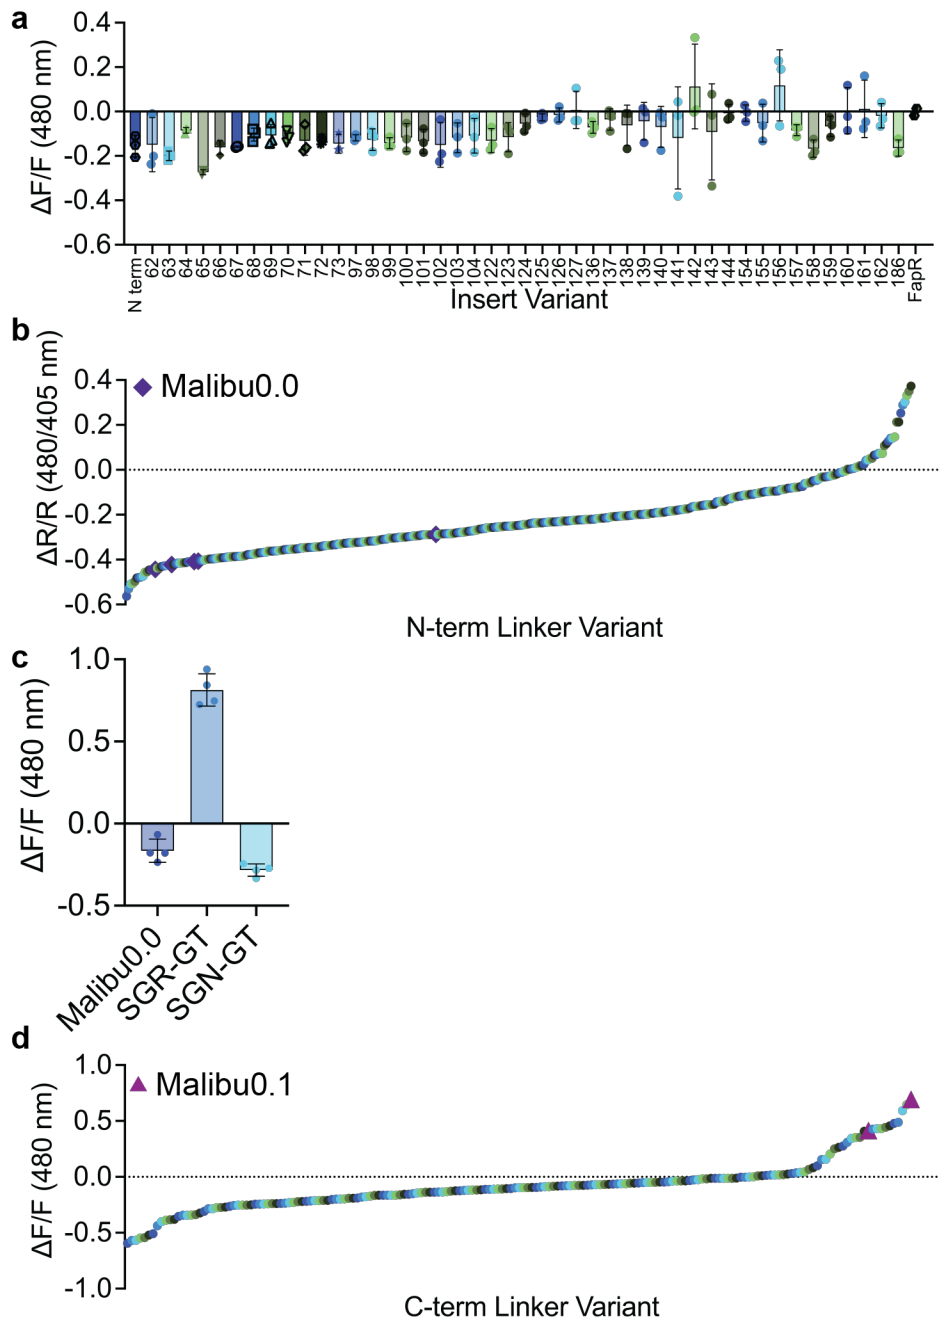

### Supplemental Figure 1. Development of Malibu.

**a**, Fluorescence change ( $\Delta F/F$ ) after addition of 500  $\mu\text{M}$  malonyl-CoA of initial Malibu variants in clarified bacterial lysate ( $n = 3$  trials).

**b**, Ratio change ( $\Delta R/R$ ) of N-terminal linker variants screened in clarified bacterial lysate, treated with 500  $\mu\text{M}$  malonyl-CoA. Performance of Malibu0.0 (purple diamonds) highlighted.

**c**, Fluorescence change ( $\Delta F/F$ ) of top N-terminal linker variants considered. Malibu0.0 has SAG-GT linkers ( $n = 4$  trials).

**d**, Fluorescence change ( $\Delta F/F$ ) of C-terminal linker variants screened in clarified bacterial lysate, treated with 450  $\mu\text{M}$  malonyl-CoA. Performance of Malibu0.1 (pink triangle) highlighted.

For all figures, dot plots show the mean  $\pm$  SD.

## Ranzau et al Supplemental Figure 2

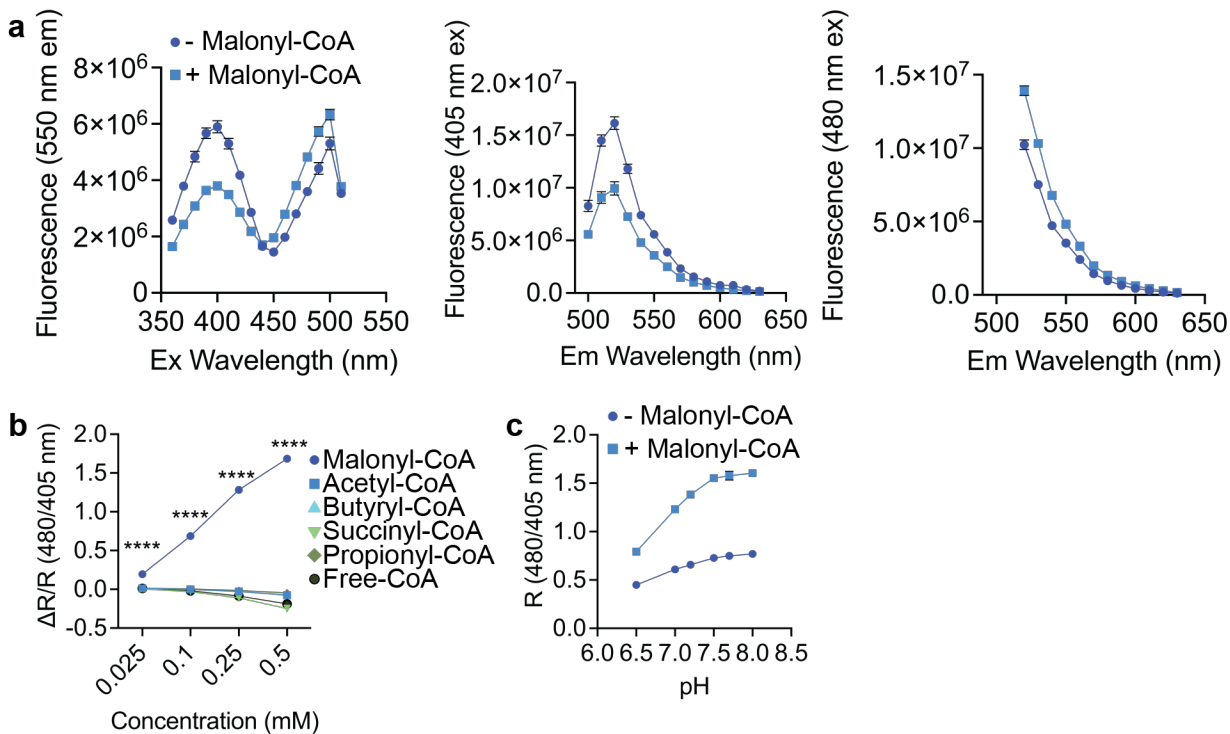

### Supplemental Figure 2. Characterization of Malibu.

**a**, (left panel) Malibu excitation sweep from 360-510 nm excitation with fluorescence measured at 550 nm emission in the presence of either vehicle (dark blue) or malonyl-CoA (500  $\mu$ M, light blue). (middle panel) Malibu emission sweep from 500-630 nm with excitation at 405 nm in the presence of either vehicle (dark blue) or malonyl-CoA (500  $\mu$ M, light blue). (right panel) Malibu emission sweep from 520-630 nm with excitation at 480 nm in the presence of either vehicle (dark blue) or malonyl-CoA (500  $\mu$ M, light blue). Data represents 4 replicates from 1 protein preparation.

**b**, Selectivity of Malibu towards malonyl-CoA, as measured by ratio change in bacterial lysate. Malibu was incubated with 0.025-0.5 mM of each respective CoA-containing molecule indicated (6 trials;  $p < 0.0001$ , two way ANOVA with Tukey's multiple comparisons test).

**c**, Unnormalized pH dependency of Malibu ratio changes in response to either vehicle (dark blue) or 500  $\mu$ M malonyl-CoA (light blue) between pH 6.5-8, averaged across 8 trials from two independent protein preparations.

For all figures, plots show the mean  $\pm$  SD.

### Ranzau et al Supplemental Figure 3

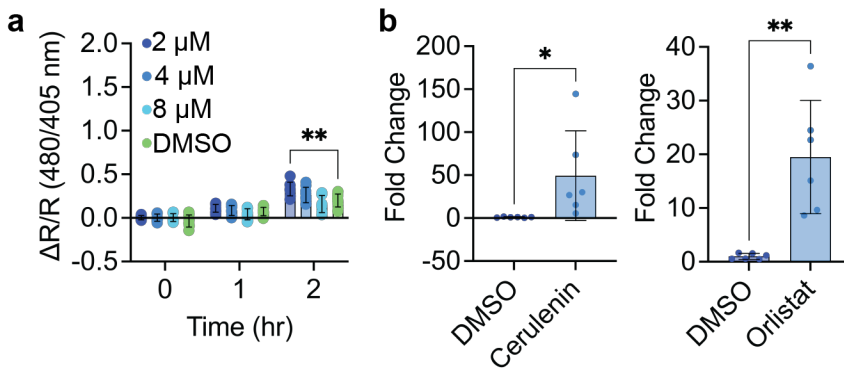

### Supplemental Figure 3. Malibu reports malonyl-CoA dynamics in cells.

**a**, Ratio change of cpEGFP expressed in BL21 *E. coli* treated with either 2  $\mu$ M cerulenin (dark blue,  $n = 8$  trials), 4  $\mu$ M cerulenin (medium blue,  $n = 8$  trials), 8  $\mu$ M cerulenin (light blue,  $n = 9$  trials), or DMSO (green,  $n = 9$  trials;  $p = 0.0052$ , 2-way ANOVA with Dunnett's multiple comparisons test).

**b**, (left) Fold change of malonyl-CoA in HeLa cells after treatment with either DMSO (dark blue,  $n = 6$  trials) or cerulenin (50  $\mu$ M for 4 hr, light blue,  $n = 6$  trials;  $p = 0.0465$ , unpaired t-test). (right) Fold change of malonyl-CoA in HeLa cells after treatment with either DMSO (dark blue,  $n = 6$  trials) or orlistat (15  $\mu$ M for 12 hr, light blue,  $n = 6$  trials;  $p = 0.0016$ , unpaired t-test).

For all figures, dot plots show the mean  $\pm$  SD.

**Ranzau et al Supplemental Table 1**

| Initial Designs   |                                                                             |
|-------------------|-----------------------------------------------------------------------------|
| Primer Number     | Sequence 5' to 3'                                                           |
| NT_fwd_bb         | GGCACAAGCTGGAGTACAACGGAACGGAGCTTTCCATACCTGAACTGAGAGAAAGAATT<br>AAGAACGTGGC  |
| NT_rev_bb         | GCCTTGATATAGACGTTTCCCGCTGACATGGATCCCCATCGATCCTTATCGTCATCGTCCG<br>TACAGATCC  |
| 62_fwd_bb         | GGCACAAGCTGGAGTACAACGGAACGGAGGACGAAGTGAAGTCCCTGTCACCTTGATGAA<br>GTTATCG     |
| 62_rev_bb         | GCCTTGATATAGACGTTTCCCGCTGAAAGTGTTTTCTCTGCCACGTTCTTAATTCTTTCTC<br>TCAGTTCAG  |
| 63_fwd_bb         | GGCACAAGCTGGAGTACAACGGAACGGACGAAGTGAAGTCCCTGTCACCTTGATGAAGTT<br>ATCG        |
| 63_rev_bb         | GCCTTGATATAGACGTTTCCCGCTGACTCAAGTGTTTTCTCTGCCACGTTCTTAATTCTTT<br>CTCTCAG    |
| 64_fwd_bb         | GGCACAAGCTGGAGTACAACGGAACGGAAAGTGAAGTCCCTGTCACCTTGATGAAGTTATC<br>GGAG       |
| 64_rev_bb         | GCCTTGATATAGACGTTTCCCGCTGAGTCCTCAAGTGTTTTCTCTGCCACGTTCTTAATTC<br>TTTCTCTC   |
| 65_fwd_bb         | CACAAGCTGGAGTACAACGGAACGGTGAAGTCCCTGTCACCTTGATGAAGTTATCGGAGA<br>AATTATTGACC |
| 65_rev_bb         | GCCTTGATATAGACGTTTCCCGCTGATTCGTCCTCAAGTGTTTTCTCTGCCACGTTCTTAA<br>TTCTTTCTC  |
| 66_fwd_bb         | GGCACAAGCTGGAGTACAACGGAACGAAGTCCCTGTCACCTTGATGAAGTTATCGGAGAA<br>ATTATTGACC  |
| 66_rev_bb         | GCCTTGATATAGACGTTTCCCGCTGACACTTCGTCCTCAAGTGTTTTCTCTGCCACG                   |
| 67_fwd_bb         | TCCCTGTCACCTTGATGAAGTTATCGGAGAAATTATTGACCTTG                                |
| 67_rev_bb         | CTTCACTTCGTCCTCAAGTGTTTTCTCTGCCACG                                          |
| 67_fwd_ins<br>ert | AAAACACTTGAGGACGAAGTGAAGTCAGCGGAAACGTCTATATCAAGGCCGACAAGCA<br>G             |
| 67_rev_ins<br>ert | CCGATAACTTCATCAAGTGACAGGGACGTTCCGTTGTA CTCCAGCTTG TGCCCCAGGAT<br>G          |
| 68_fwd_bb         | GGCACAAGCTGGAGTACAACGGAACGCTGTCACTTGATGAAGTTATCGGAGAAATTATTG<br>ACCTTGAGC   |
| 68_rev_bb         | GCCTTGATATAGACGTTTCCCGCTGAGGACTTCACTTCGTCCTCAAGTGTTTTCTCTGCC<br>ACG         |
| 69_fwd_bb         | GGCACAAGCTGGAGTACAACGGAACGTCACCTTGATGAAGTTATCGGAGAAATTATTGACC<br>TTGAGCTGG  |
| 69_rev_bb         | GCCTTGATATAGACGTTTCCCGCTGACAGGGACTTCACTTCGTCCTCAAGTGTTTTCTCT<br>GCCACG      |
| 70_fwd_bb         | GGCACAAGCTGGAGTACAACGGAACGCTTGATGAAGTTATCGGAGAAATTATTGACCTTG<br>AGCTGGATG   |
| 70_rev_bb         | GCCTTGATATAGACGTTTCCCGCTGATGACAGGGACTTCACTTCGTCCTCAAGTGTTTTC<br>TCTGC       |
| 71_fwd_bb         | GCACAAGCTGGAGTACAACGGAACGGATGAAGTTATCGGAGAAATTATTGACCTTGAGC<br>TGGATGATCAG  |
| 71_rev_bb         | GCCTTGATATAGACGTTTCCCGCTGAAAGTGACAGGGACTTCACTTCGTCCTCAAGTGTT<br>TTCTCTGC    |
| 72_fwd_bb         | GGCACAAGCTGGAGTACAACGGAACGGAAGTTATCGGAGAAATTATTGACCTTGAGCTG<br>GATGATCAGGC  |
| 72_rev_bb         | GCCTTGATATAGACGTTTCCCGCTGAATCAAGTGACAGGGACTTCACTTCGTCCTCAAGT<br>GTTTTCTCTG  |

|                |                                                                       |
|----------------|-----------------------------------------------------------------------|
| 73_fwd_bb      | GGCACAAGCTGGAGTACAACGGAACGGTTATCGGAGAAATTATTGACCTTGAGCTGGATGATCAGGC   |
| 73_rev_bb      | GCCTTGATATAGACGTTTCCCGCTGATTCATCAAGTGACAGGGACTTCACTTCGTCTCAAGTG       |
| 97_fwd_bb      | GGCACAAGCTGGAGTACAACGGAACGGTGTTTCAGCCGGAATCAGATTGCGAGAGGACACC         |
| 97_rev_bb      | GCCTTGATATAGACGTTTCCCGCTGAGTGCTCCTGTTTTATTTCTAAAATGGATATCGCCTGATCATCC |
| 98_fwd_bb      | GGCACAAGCTGGAGTACAACGGAACGTTTCAGCCGGAATCAGATTGCGAGAGGACACC            |
| 98_rev_bb      | GCCTTGATATAGACGTTTCCCGCTGACACGTGCTCCTGTTTTATTTCTAAAATGGATATCGCCTGATC  |
| 99_fwd_bb      | AGCCGGAATCAGATTGCGAGAGGACACCAT                                        |
| 99_rev_bb      | GAACACGTGCTCCTGTTTTATTTCTAAAATGGATATCGCCTG                            |
| 99_fwd_insert  | GAAATAAACAGGAGCACGTGTTCTCAGCGGAAACGTCTATATCAAGGCCGACAAGCAG            |
| 99_rev_insert  | TGTCCTCTCGCAATCTGATTCGGGCTCGTTCGGTTGTACTIONCAGCTTGTGCCCCAGGATG        |
| 100_fwd_b      | GGCACAAGCTGGAGTACAACGGAACGCGGAATCAGATTGCGAGAGGACACCATTATTTGCAC        |
| 100_rev_bb     | GCCTTGATATAGACGTTTCCCGCTGAGCTGAACACGTGCTCCTGTTTTATTTCTAAAATGGATATCGCC |
| 101_fwd_b      | GGCACAAGCTGGAGTACAACGGAACGAATCAGATTGCGAGAGGACACCATTATTTGCACAGGC       |
| 101_rev_bb     | GCCTTGATATAGACGTTTCCCGCTGACCGGCTGAACACGTGCTCCTGTTTTATTTCTAAATGGATATCG |
| 102_fwd_b      | GGCACAAGCTGGAGTACAACGGAACGCAGATTGCGAGAGGACACCATTATTTGCACAGGCG         |
| 102_rev_bb     | GCCTTGATATAGACGTTTCCCGCTGAATTCCGGCTGAACACGTGCTCCTGTTTTATTTCTAAATGG    |
| 103_fwd_b      | GGCACAAGCTGGAGTACAACGGAACGATTGCGAGAGGACACCATTATTTGCACAGGCGAAC         |
| 103_rev_bb     | GCCTTGATATAGACGTTTCCCGCTGACTGATTCCGGCTGAACACGTGCTCCTGTTTTATTCTAAAATGG |
| 104_fwd_b      | GGCACAAGCTGGAGTACAACGGAACGGCGAGAGGACACCATTATTTGCACAGGCGAACCTTTGGC     |
| 104_rev_bb     | GCCTTGATATAGACGTTTCCCGCTGAAATCTGATTCCGGCTGAACACGTGCTCCTG              |
| 122_fwd_b      | GGCACAAGCTGGAGTACAACGGAACGGATGACGAGCTGGCGCTGACTGCAAGTGC               |
| 122_rev_bb     | GCCTTGATATAGACGTTTCCCGCTGAAATGACTGCAACGGCCAAAGAGTTTCGCCTGTGC          |
| 123_fwd_b      | GGCACAAGCTGGAGTACAACGGAACGGACGAGCTGGCGCTGACTGCAAGTGCAGAC              |
| 123_rev_bb     | GCCTTGATATAGACGTTTCCCGCTGAATCAATGACTGCAACGGCCAAAGAGTTTCGCCTGTGC       |
| 124_fwd_b      | GAGCTGGCGCTGACTGCAAGTGCAGACATC                                        |
| 124_rev_bb     | GTCATCAATGACTGCAACGGCCAAAGAGTTTCG                                     |
| 124_fwd_insert | TTGGCCGTTGCAGTCATTGATGACTCAGCGGAAACGTCTATATCAAGGCCGACAAGCAG           |
| 124_rev_insert | GATGTCTGCACTTGCAGTCAGCGCCAGCTCCGTTCCGTTGTACTIONCAGCTTGTGCCCAAG        |
| 125_fwd_b      | GGCACAAGCTGGAGTACAACGGAACGCTGGCGCTGACTGCAAGTGCAGACATCCGC              |
| 125_rev_bb     | GCCTTGATATAGACGTTTCCCGCTGACTCGTCATCAATGACTGCAACGGCCAAAGAGTTTCG        |

|                |                                                                        |
|----------------|------------------------------------------------------------------------|
| 126_fwd_b<br>b | GGCACAAGCTGGAGTACAACGGAACGGCGCTGACTGCAAGTGCAGACATCCGC                  |
| 126_rev_bb     | GCCTTGATATAGACGTTTCCCGCTGACAGCTCGTCATCAATGACTGCAACGGCCAAAGAGTTTCG      |
| 127_fwd_b<br>b | GGCACAAGCTGGAGTACAACGGAACGCTGACTGCAAGTGCAGACATCCGCTTTACAAGACAGGTAAAGC  |
| 127_rev_bb     | GCCTTGATATAGACGTTTCCCGCTGACGCCAGCTCGTCATCAATGACTGCAACGGC               |
| 136_fwd_b<br>b | GGCACAAGCTGGAGTACAACGGAACGACAAGACAGGTAAAGCAGGGTGAACGTGTCGTAGCAAAAAGCG  |
| 136_rev_bb     | GCCTTGATATAGACGTTTCCCGCTGAAAAGCGGATGTCTGCACTTGCAGTCAGCG                |
| 137_fwd_b<br>b | GGCACAAGCTGGAGTACAACGGAACGAGACAGGTAAAGCAGGGTGAACGTGTCGTAGCAAAAAGCG     |
| 137_rev_bb     | GCCTTGATATAGACGTTTCCCGCTGATGTAAAGCGGATGTCTGCACTTGCAGTCAGCGC            |
| 138_fwd_b<br>b | GGCACAAGCTGGAGTACAACGGAACGCAGGTAAAGCAGGGTGAACGTGTCGTAGCAAAAAGCG        |
| 138_rev_bb     | GCCTTGATATAGACGTTTCCCGCTGATCTTGTAAGCGGATGTCTGCACTTGCAGTCAGCGC          |
| 139_fwd_b<br>b | GGCACAAGCTGGAGTACAACGGAACGGTAAAGCAGGGTGAACGTGTCGTAGCAAAAAGCG           |
| 139_rev_bb     | GCCTTGATATAGACGTTTCCCGCTGACTGTCTTGTAAGCGGATGTCTGCACTTGCAGTCAGCG        |
| 140_fwd_b<br>b | GGCACAAGCTGGAGTACAACGGAACGAAGCAGGGTGAACGTGTCGTAGCAAAAAGCGAAAGTGACGGC   |
| 140_rev_bb     | GCCTTGATATAGACGTTTCCCGCTGATACCTGTCTTGTAAGCGGATGTCTGCACTTGC             |
| 141_fwd_b<br>b | GGCACAAGCTGGAGTACAACGGAACGCAGGGTGAACGTGTCGTAGCAAAAAGCGAAAGTGACGGC      |
| 141_rev_bb     | GCCTTGATATAGACGTTTCCCGCTGACTTTACCTGTCTTGTAAGCGGATGTCTGCACTTGCAGTC      |
| 142_fwd_b<br>b | GGCACAAGCTGGAGTACAACGGAACGGTGAACGTGTCGTAGCAAAAAGCGAAAGTGACGGC          |
| 142_rev_bb     | GCCTTGATATAGACGTTTCCCGCTGACTGCTTTACCTGTCTTGTAAGCGGATGTCTGCACTTGC       |
| 143_fwd_b<br>b | GGCACAAGCTGGAGTACAACGGAACGGAACGTGTCGTAGCAAAAAGCGAAAGTGACGGC            |
| 143_rev_bb     | GCCTTGATATAGACGTTTCCCGCTGAACCCTGCTTTACCTGTCTTGTAAGCGGATGTCTGC          |
| 144_fwd_b<br>b | GGCACAAGCTGGAGTACAACGGAACGCGTGTCTAGCAAAAAGCGAAAGTGACGGC                |
| 144_rev_bb     | GCCTTGATATAGACGTTTCCCGCTGATTCACCCTGCTTTACCTGTCTTGTAAGCGGATGTCTGC       |
| 154_fwd_b<br>b | GGCACAAGCTGGAGTACAACGGAACGGTCAAAAAGAAAAGGAAGAACGGTTGTCGAAAGTGACAGC     |
| 154_rev_bb     | GCCTTGATATAGACGTTTCCCGCTGAAGCCGTCACCTTTGCTTTTGGCTACGACACG              |
| 155_fwd_b<br>b | GGCACAAGCTGGAGTACAACGGAACGGAAAAGAAAAGGAAGAACGGTTGTCGAAAGTGACAGC        |
| 155_rev_bb     | GCCTTGATATAGACGTTTCCCGCTGAGACAGCCGTCACCTTTGCTTTTGGCTACGACACGTCACCCCTGC |
| 156_fwd_b<br>b | GGCACAAGCTGGAGTACAACGGAACGAAAGAAAAGGAAGAACGGTTGTCGAAAGTGACAGC          |
| 156_rev_bb     | GCCTTGATATAGACGTTTCCCGCTGATTCGACAGCCGTCACCTTTGCTTTTGGCTACGACACG        |
| 157_fwd_b<br>b | GGCACAAGCTGGAGTACAACGGAACGGAAAAGGAAGAACGGTTGTCGAAAGTGACAGC             |

|                      |                                                                            |
|----------------------|----------------------------------------------------------------------------|
| 157_rev_bb           | GCCTTGATATAGACGTTTCCCGCTGATTTTTTCGACAGCCGTCACCTTTCGCTTTTGCTACG<br>ACACG    |
| 158_fwd_b<br>b       | GGCACAAGCTGGAGTACAACGGAACGAAAGGAAGAACGGTTGTCTGAAGTGAACAGCTAC<br>GTTGGC     |
| 158_rev_bb           | GCCTTGATATAGACGTTTCCCGCTGATTCTTTTTTCGACAGCCGTCACCTTTCGCTTTTGCTA<br>CG      |
| 159_fwd_b<br>b       | GGCACAAGCTGGAGTACAACGGAACGGGAAGAAGAACGGTTGTCTGAAGTGAACAGCTACGTT<br>GGCG    |
| 159_rev_bb           | GCCTTGATATAGACGTTTCCCGCTGATTTTTCTTTTTTCGACAGCCGTCACCTTTCGCTTTTG<br>CTACG   |
| 160_fwd_b<br>b       | GGCACAAGCTGGAGTACAACGGAACGAGAACGGTTGTCTGAAGTGAACAGCTACGTTGG<br>CG          |
| 160_rev_bb           | GCCTTGATATAGACGTTTCCCGCTGATCCTTTTTCTTTTTTCGACAGCCGTCACCTTTCGCTT<br>TTGC    |
| 161_fwd_b<br>b       | GGCACAAGCTGGAGTACAACGGAACGACGGTTGTCTGAAGTGAACAGCTACGTTGGCG                 |
| 161_rev_bb           | GCCTTGATATAGACGTTTCCCGCTGATCTTCCTTTTTCTTTTTTCGACAGCCGTCACCTTTCG<br>C       |
| 162_fwd_b<br>b       | GGCACAAGCTGGAGTACAACGGAACGGTTGTCTGAAGTGAACAGCTACGTTGGCGAAG                 |
| 162_rev_bb           | GCCTTGATATAGACGTTTCCCGCTGACGTTCTTCCTTTTTCTTTTTTCGACAGCCGTCACCT<br>TCGC     |
| 186_fwd_b<br>b       | GGCACAAGCTGGAGTACAACGGAACGCATTCATAAGAATTCGAAGCTTGATCCGGCTGC<br>TAACAAAGC   |
| 186_rev_bb           | CTTGATATAGACGTTTCCCGCTGATTTTGAACGATACATGTCAAAGCGTCCAGAAAAAAC<br>AATTTCTTCG |
| fwd_insert           | TCAGCGGGAAACGTCTATATCAAGGCCGACAAGC                                         |
| rev_insert           | CGTTCCGTTGTA CTCCAGCTTGTGCCCCAGG                                           |
| Further developments |                                                                            |
| Primer<br>Number     | Sequence 5' to 3'                                                          |
| 1                    | AATGCGTCTCTCGAATCANNKNNKAACGTCTATATCAAGGC                                  |
| 2                    | TAATCGTCTCATCACCGTTCCGTTGTA CT                                             |
| 3                    | AATGCGTCTCTGTGAAGTCCCTGTCACTTGATG                                          |
| 4                    | TAATCGTCTCATTCGTCCTCAAGTGTTTTCTC                                           |
| 5                    | AATGCGTCTCTGTGAAGTCCCTGTCACTTGATG                                          |
| 6                    | TAATCGTCTCATACCAGAACCCCGCATATGTATATCTC                                     |
| 7                    | AATGCGTCTCTGGTATGGCTAGCATGACTGG                                            |
| 8                    | TAATCGTCTCATCACMNNMNNGTTGTA CTCCAGCTTGTGC                                  |
| 9                    | GAATTCTGAAGCTTGATCCGGCTGCTAACAAAGCCCGAAAGGAAG                              |
| 10                   | GGCCACCGCGTTGCCGCTGCCGGTGCTCTGCAGTGAATGTTTTGAACGATACATG                    |
| 11                   | GCAACGCGGTGGGCCAGGATACCCAGGAACGCGCCACCATGGTGAGCAAGGGCGAGG<br>CAG           |
| 12                   | GCCGGATCAAGCTTCTGAATTCTTACTTGTACAGCTCGTCCATGCCGCC                          |
| 13                   | GAATTCTGCAGATATCCATCACACTGGCGGCCGCTCG                                      |
| 14                   | GATCCTTATCGTCATCGTCGTACAGATCCCGACCCATTTGC                                  |
| 15                   | GTACGACGATGACGATAAGGATCCCATGGAGCTTTCCATACCTGAACTGAGAGAAAGAAT               |
| 16                   | CACCGGCGGCATGGACGAGCTGTACAAGTAAGAATTCTGCAGATATCCATCACACTGGC<br>G           |
| 17                   | GGCGGCATGGACGAGCTGTACAAGTAAGAATTCTGCAG                                     |



|    |                                                                                  |
|----|----------------------------------------------------------------------------------|
| 18 | GTCCATGCCGCCGGTGGAGTGGCGGC                                                       |
| 19 | CAGATTGCGAGAGTACACCATTTATTTGCACAGGCGAACTC                                        |
| 20 | GTGTA CTCTCGCAATCTGATTCCGGCTGAACACGTG                                            |
| 21 | CGTGGACTGCAAGTGCAGACATCCGCTTTACAAGACAGG                                          |
| 22 | CACTTGCAGTCCACGCCAGCTCGTCATCAATGACTGC                                            |
| 23 | GATTGCGGCAGGACACCATTTATTTGCACAGGCGAAC                                            |
| 24 | GTCCTGCCGCAATCTGATTCCGGCTGAACACGTG                                               |
| 25 | TACCGTCTCCCCATGATGATGATGATGATGAGAACCCATATGTATATCTCCTTCTTAAAG<br>TTAAACAAAATTATTC |
| 26 | TACCGTCTCCTGGGGGCGGAGAGAATTTGTA CTTTCAGGGAGGCGGAGGATCCATGGA<br>GCTTCCATACCTG     |
| 27 | TACCGTCTCCCAGGGTGAACGTGTCGTAGC                                                   |
| 28 | TACCGTCTCCCCTGCTTTACCTGTCTTGTAAGCG                                               |
